# White Matter Development in Early Puberty: A Longitudinal Volumetric and Diffusion Tensor Imaging Twin Study

Rachel M. Brouwer<sup>1\*</sup>, René C. W. Mandl<sup>1</sup>, Hugo G. Schnack<sup>1</sup>, Inge L. C. van Soelen<sup>1,2</sup>, G. Caroline van Baal<sup>1</sup>, Jiska S. Peper<sup>1,3</sup>, René S. Kahn<sup>1</sup>, Dorret I. Boomsma<sup>2</sup>, H. E. Hulshoff Pol<sup>1</sup>

**1** Department of Psychiatry, Rudolf Magnus Institute of Neuroscience, University Medical Center Utrecht, Utrecht, The Netherlands, **2** Department of Biological Psychology, VU University Amsterdam, Amsterdam, The Netherlands, **3** Brain and Development Laboratory, Leiden University, Leiden, The Netherlands

## Abstract

White matter microstructure and volume show synchronous developmental patterns in children. White matter volume increases considerably during development. Fractional anisotropy, a measure for white matter microstructural directionality, also increases with age. Development of white matter volume and development of white matter microstructure seem to go hand in hand. The extent to which the same or different genetic and/or environmental factors drive these two aspects of white matter maturation is currently unknown. We mapped changes in white matter volume, surface area and diffusion parameters in mono- and dizygotic twins who were scanned at age 9 (203 individuals) and again at age 12 (126 individuals). Over the three-year interval, white matter volume (+6.0%) and surface area (+1.7%) increased, fiber bundles expanded (most pronounced in the left arcuate fasciculus and splenium), and fractional anisotropy increased (+3.0%). Genes influenced white matter volume (heritability ~85%), surface area (~85%), and fractional anisotropy (locally 7% to 50%) at both ages. Finally, volumetric white matter growth was negatively correlated with fractional anisotropy increase ( $r = -0.62$ ) and this relationship was driven by environmental factors. In children who showed the most pronounced white matter growth, fractional anisotropy increased the least and vice-versa. Thus, white matter development in childhood may reflect a process of both expansion and fiber optimization.

**Citation:** Brouwer RM, Mandl RCW, Schnack HG, van Soelen ILC, van Baal GC, et al. (2012) White Matter Development in Early Puberty: A Longitudinal Volumetric and Diffusion Tensor Imaging Twin Study. *PLoS ONE* 7(4): e32316. doi:10.1371/journal.pone.0032316

**Editor:** Yong He, Beijing Normal University, Beijing, China

**Received:** September 22, 2011; **Accepted:** January 25, 2012; **Published:** April 13, 2012

**Copyright:** © 2012 Brouwer et al. This is an open-access article distributed under the terms of the Creative Commons Attribution License, which permits unrestricted use, distribution, and reproduction in any medium, provided the original author and source are credited.

**Funding:** This research has been supported by grants from the Netherlands Organisation for Scientific Research (NWO 51.02.060, NWO 480-04-004), the High Potential Grant University Utrecht, Hersenstichting Nederland (2010(1)-79) and European Research Council (ERC-230374). The funders had no role in study design, data collection and analysis, decision to publish, or preparation of the manuscript.

**Competing Interests:** The authors have declared that no competing interests exist.

\* E-mail: r.m.brouwer-4@umcutrecht.nl

## Introduction

During development, the composition of the brain changes substantially. After a remarkable increase in white matter volume in the first few years of life, both gray and white matter of the brain have been found to steadily increase during childhood, using conventional anatomical magnetic resonance imaging. While gray matter volume starts to decrease around the start of puberty, white matter volume continues to increase well into adulthood [1–3]. Indeed, at the age when thinning of the cortex has already started [4–5], white matter expands considerably. The biological processes that underlie these white matter changes are still largely unknown.

With diffusion tensor imaging (DTI; [6]) the white matter of the brain can be studied in more detail compared to conventional magnetic resonance brain imaging. DTI quantifies diffusion of water molecules in the brain. In white matter bundles, water diffuses more easily in the direction parallel to axons (axial diffusivity) than in the direction perpendicular to axons (radial diffusivity). Fractional anisotropy [7] is a combination of these two and represents microstructural directionality, or so-called ‘fiber integrity’. White matter microstructural development, as measured with DTI, shows a pattern parallel to the development of white

matter volume. Numerous studies have been carried out to investigate age-related changes in diffusion properties in childhood and adolescence. Despite differences in methodology and diffusion parameters that were studied, these studies all indicate that anisotropy increases with age during development, with the fastest increases in infancy and young childhood ([8–9]; see [10–12] for reviews on earlier studies). These cross-sectional findings have been replicated in three recent longitudinal studies ([13] age 16–21; [14] age 14–19; [15] age 5–32). To summarize, the development of white matter volume and of white matter microstructure follow the same pattern and seem to go hand in hand.

Small to moderate associations between white matter volume and diffusion in the brain in adolescents were found in a single study that employed a cross-sectional design [16]. So far, the etiology of these associations has not been studied. In our study, we explored the development of white matter in children using a longitudinal design with a 3-year test-retest interval. We studied local changes in white matter volume and in white matter microstructure in a sample of twins between the age of 9 and 12 years using magnetic resonance brain imaging. The following questions were addressed: 1) How do white matter volume and white matter microstructure change between the ages of 9 and 12?

Are these quantities and/or their changes related? 2) What is the heritability of white matter volume, white matter microstructure and their changes? If these are associated, are these relationships genetic or environmental in nature?

## Materials and Methods

### Subjects

Participating in this study were 108 twin families. Twins were first recruited at 9 years of age through the Netherlands Twin Registry [17]. At the first measurement at age 9 (mean 9.2, sd 0.11 years), 203 twin subjects (88 monozygotic twin subjects, 43 complete pairs and 67 dizygotic twin subjects, 53 complete pairs - 101 males, 102 females) underwent an extensive MRI protocol, as was described before [18–19]. Exclusion criteria consisted of having a pacemaker, any metal material in the head and a known history of any psychiatric illness or major medical condition. Psychiatric and medical status was confirmed through a medical questionnaire filled in by the parents at the time of MRI scanning. Three years later, 126 twin subjects returned at age 12 (mean 12.1, sd 0.24 years) (59 monozygotic twins, 25 complete pairs and 67 dizygotic twin subjects, 27 complete pairs - 64 males, 62 females). Mean scanning interval was 2.9 (0.2) years. Zygosity of same-sex twins was determined based on DNA polymorphisms, using 8–11 highly polymorphic di-, tri- and tetranucleotide genetic markers. Handedness was determined according to the Edinburgh Handedness Inventory. At baseline 84% of the sample was right-handed; at follow-up 83%. Both parents and children gave written informed consent to participate in the study. The study was approved by the Central Committee on Research involving Human Subjects of the Netherlands (CCMO) and was in agreement with the Declaration of Helsinki (Edinburgh amendments).

### MRI Acquisition and Preprocessing

Magnetic resonance imaging and post-processing of the data was done at the University Medical Center, Utrecht. For both measurements, structural magnetic resonance images were made on a 1.5 Tesla Philips Achieva scanner (Philips, Best, the Netherlands) using the same protocol. A three-dimensional T1-weighted scan (Spoiled Gradient Echo; TE = 4.6 ms; TR = 30 ms; flip angle 30°; 160–180 contiguous coronal slices of 1.2 mm; in-plane resolution 1×1 mm<sup>2</sup>; acquisition matrix 256×256) of the whole head was made of each subject. To increase signal to noise ratio, two Single Shot Echo Planar Imaging (SS-EPI) DTI scans were acquired (32 diffusion-weighted volumes with diffusion weighting  $b = 1000$  s/mm<sup>2</sup> and 32 non-collinear diffusion gradient directions; 8 diffusion-unweighted ( $b = 0$  s/mm<sup>2</sup>) scans; TE = 88 ms; TR = 9822 ms; parallel imaging SENSE factor 2.5; flip angle 90°; 60 transverse slices of 2.5 mm, no gap, FOV 240 mm; 128×128 reconstruction matrix; 96×96 acquisition matrix, no cardiac gating). The DTI scans were combined and corrected for geometric distortions [20], but due to the use of parallel imaging with a short echo time at 1.5 Tesla, susceptibility distortions are expected to be minimal. Subsequently, the diffusion pattern in each voxel was fitted to a tensor matrix using a robust M-estimator [21], providing three eigenvectors (representing the three principal directions of diffusion) and corresponding eigenvalues ( $\lambda_1 > \lambda_2 \approx \lambda_3$ , in white matter). Fractional anisotropy values were calculated in each voxel as a measure of microstructural directionality from the eigenvalues [7]. Further, axial/longitudinal ( $\lambda_1$ ) and radial/transverse  $((\lambda_2 + \lambda_3)/2)$  diffusivity were computed.

To obtain white matter volume and mean white matter fractional anisotropy, gray and white matter were segmented

from the T1-weighted images using a partial volume segmentation [22]. Reliable gray and white matter segmentations were available in 187 children at baseline, and 117 children at follow-up. A pure white matter mask was created by selecting all voxels that were classified as having at least 90% white matter content. For computation of the mean fractional anisotropy in pure white matter, the b0 scan was registered to the T1-weighted scan using a rigid transformation (no scaling), based on optimization of a mutual information metric [23]. Possible local DTI distortions therefore may be expected to have limited influence on the registration. Diffusion parameters were warped on the T1-weighted scan using this rigid transformation and mean fractional anisotropy in pure white matter was computed by averaging over the voxels in the pure white matter mask.

### Deformation Based Morphometry

To study morphological changes between baseline and follow-up, the deformation fields of the T1-weighted images from baseline to follow-up were computed using a combination of linear and non-linear transformations [24] with increasing precision up to the scanning resolution. The determinants of the Jacobian matrix  $J$  of these deformation fields were computed, which were used to assess expansion or contraction of tissue. The determinant maps were warped into model space, again with a precision up to scanning resolution. The model brain was created using the T1-weighted images from the follow-up measurement, (analogous to [25]). Voxels were resampled to a resolution of 2×2×2.4 mm<sup>3</sup>. Each voxel was tested for volumetric change (either expansion or contraction,  $|J| \neq 1$ ). A correction for multiple comparisons was applied according to the false discovery rate (FDR; [26]) at a 0.05 level.

### Fiber Tractography

Analogous to the analysis at the baseline measurement [19] we created average fiber tracts for the whole group containing scans for both measurements, to study parts of the fiber tract that are common to most subjects [27–28]. First, all possible fiber tracts in the brain were reconstructed in individual space using the FACT algorithm (Fiber Assignment by Continuous Tracking; [29]), with 8 seedpoints per voxel (taking the corners of small cubes inside a voxel as seed points, placed such that the smaller cubes form a regular grid), a fractional anisotropy threshold of 0.1 and maximal angle of 45°. These settings were chosen to perform rather liberal fiber tracking. Subsequent fiber averaging removes superfluous tracts. Per subject, all reconstructed tracts were superimposed with axial diffusivity, radial diffusivity and fractional anisotropy values. Next, for each subject, the complete set of tracts – which was reconstructed in native space – was warped into model space using a nonlinear transformation. For each subject this nonlinear transformation was obtained by concatenating the (linear) transformation that registers the b0 image to the T1-weighted image (in native space) with the (nonlinear) transformation that warps the T1-weighted image to the model brain. Finally, multiple regions of interest (ROIs) were defined in model space allowing us to select 14 different major fiber tracts for each subject: the arcuate fasciculi, uncinate fasciculi, fornices, cinguli, inferior longitudinal fasciculi and inferior fronto-occipital fasciculi bilaterally, and the genu and splenium of the corpus callosum [28][30].

### Creation of Average Fibers

For each individual separately, we created an average fiber bundle at group level for the 14 major fiber tracts as described in [28]. In short, for each fiber bundle, the middle points of all fibers in the bundle were determined and the (spatial) average served as a

starting point for the average fiber. Subsequently, the  $n^{\text{th}}$  coordinate of the average fiber was computed as the spatial average of the points in the fiber bundle at distance  $2n$  mm from the starting point. The individual average fibers were smoothed and resampled to their original resolution. As tracking results may vary per individual, the individual average fiber bundles (combining all children at both measurements) were averaged again. Because the outer ends of fiber bundles may differ per individual close to gray matter, we ignored parts of this average fiber to which less than 25% of the sample contributed. This procedure created a (spatial) average fiber bundle at group level. Now, for each individual and each fiber bundle, the fiber bundles were projected onto their respective group averages. If the individual fiber tracking results were too far ( $>1$  cm) from the average fiber, we considered this measurement to be unreliable. Therefore, not all fiber bundles could be traced in all children (see Tables 2–4 for exact numbers). Mean fractional anisotropy, axial diffusivity and radial diffusivity along these bundles was obtained per subject. For the comparison of white matter volumetric measures and DTI quantities, masks of fiber bundles were created in model space as follows: For each individual, voxels in model space were flagged according to whether the individual average fiber bundle passed through these voxels. These individual masks were summed and were subsequently used to create weighted averages per individual of the Jacobian in this fiber bundle.

### Surface Area Measures

White matter surface area was computed using a custom version of the CLASP algorithm, designed at the McConnell Brain Imaging Centre, Montreal [31–32], which started from the gray and white matter segments created by our own algorithm as described above. A 3D surface consisting of 40962 vertices was fitted to the white matter/gray matter interface, which created the inner surface of the cortex, i.e. the white matter surface [31]. Region-of-Interests (ROIs) were automatically segmented using the automated anatomical labelling (AAL) atlas [33] resulting in 78 ROIs (39 for both left and right hemispheres). Total, lobular and regional white matter surface area was computed for each individual.

### Statistical analysis

Changes over time were evaluated using paired t-tests. Absolute and relative change measures over time were computed for white matter volume, white matter surface area and mean fractional anisotropy in pure white matter. Pearson's correlations were used when studying the associations between these change measures. In all non-genetic analyses, the degrees of freedom were adjusted to account for familial dependencies in the data, using the number of families instead of the number of children as the sample size.

### Twin Data - Structural Equation Modeling

Twin data can be used to estimate the respective contributions of genetic and unique environmental influences on a certain trait [34], as well as on the covariance between traits [35]. Genetic influence cause biological relatives to resemble each other, as do environmental influences that are shared by family members. Environmental factors that are not shared cause differences among family members. As monozygotic (MZ) twins share (almost) 100% of their segregating genes and dizygotic (DZ) twins share on average 50% of their segregating genes, a higher correlation between members of MZ twin pairs than between members of DZ twin pairs indicates that genes, rather than shared environment, play a role in explaining the resemblance between co-twins. The proportion of variance that can be attributed to genetic factors is

called *heritability*. Amongst the assumptions of the twin design are the equal environment assumption (MZ twin pairs are not treated differently by their environment than DZ pairs) and random mating (in this case, parents did not choose their mates based on brain size or fractional anisotropy) [34].

Heritability estimates for white matter volume, white matter surface area and mean fractional anisotropy in pure white matter were obtained by structural equation modeling of data obtained at age 9 and age 12 years. A bivariate genetic model specified traits at both ages to be influenced by additive genetic factors and by unique environment (for a detailed description of such a model, see e.g [36]). Heritability estimates of fractional anisotropy in fiber bundles were obtained through a (multivariate) Cholesky decomposition [37] analogous to the analysis at baseline [19]. To limit the amount of variables in one analysis, we performed three separate analyses: one for callosal fibers (genus and splenium of corpus callosum), one for fibers in the left hemisphere (left arcuate, cingulum, fornix, IFO, ILF, and uncinate) and one for fibers in the right hemisphere (right arcuate, cingulum, fornix, IFO, ILF, and uncinate). All three analyses included both baseline and follow-up measures. Confidence intervals for heritability estimates were obtained through maximum likelihood estimation, with lower and upper bound being the point for which the log-likelihood changes more than 2.71.

Next, observed correlations between change measures over time were investigated to determine whether they are genetic or environmental in origin: larger cross-twin cross-trait correlations in MZ twins compared to DZ twins indicate that the association is driven by genetic sources. Genetic ( $r_g$ ) and environmental ( $r_c$ ) correlations, representing the amount of overlap between genetic and environmental factors that influence both traits, were derived from the bivariate model [25]. All genetic analyses were performed in Mx [38]. All genetic analyses included sex and handedness as fixed effects on the means.

### Post-hoc Analysis: Histogram Comparisons

It can be suggested that the inverse relationship found between white matter growth and fractional anisotropy increase may be the results of segmentation: it could be the case that in children that showed to most pronounced volumetric white matter growth, more regions of crossing fibers are included in the white matter mask. This would result in a lower mean fractional anisotropy. To test this, we selected two groups of children with “extreme” volumetric white matter changes: one consisting of children with a relatively large volumetric growth ( $>\text{mean}+1$  s.d.) (13 children) and one of children with a relatively small volumetric white matter growth ( $<\text{mean}-1$  s.d.) (14 children). Instead of selecting white matter in individual space, we warped all images to the model brain, on which we selected pure white matter. Fractional anisotropy was therefore measured in the same areas and differences cannot originate from the individual segmentations. Then we computed FA histograms in the pure white matter mask. If the above were true, an increase in low FA values should be observed in the group of children with relatively large white matter growth.

### Results

There were no differences in sex, handedness, age at baseline/follow-up or zygosity between children that were measured twice and children who participated only once ( $p$ 's $>0.17$ ). See Table 1 for demographics.

## Volumetric White Matter Growth

White matter volume of the total brain increased on average from 512.9 ml (s.d. 57.9) to 543.9 ml (s.d. 63.3) (6.0%,  $p < 0.001$ ) between baseline and follow-up. Locally, the deformation-based analysis revealed large significant clusters of white matter tissue expansion ( $|J| > 1$ ) in which many major fiber bundles are visible ( $|t| > 2.37$ , FDR corrected). These include areas covering the corpus callosum, the cortical spinal tracts, the cerebellar peduncle, bilateral cinguli, bilateral superior longitudinal fasciculi (including the arcuate fasciculi), bilateral fornices, bilateral inferior longitudinal fasciculi/posterior thalamic radiation, bilateral inferior fronto-occipital fasciculi, and bilateral uncinate fasciculi (Figure 1). Tissue contraction occurs in gray matter at the gray/white matter interface and around the ventricles, see Figure S1.

Averaging the Jacobians over the fiber bundles, lengthening and thickening of the bundles was found ( $|J| > 1$ ,  $p's < 1 \times 10^{-6}$ ), with the most pronounced expansion in the left arcuate fasciculus ( $|J| = 1.08$ ), and the splenium of the corpus callosum ( $|J| = 1.08$ ) and the least prominent expansion in the left and right cinguli ( $|J| = 1.02$  for both).

## Microstructural White Matter Changes

In all 14 fiber tracts, fractional anisotropy increased (on average between 1.3% and 6.9%, Table 2; Figure 2) ( $p's < 0.012$ ). In most fibers, the increase in fractional anisotropy is due to both an increase in axial diffusivity and a decrease in radial diffusivity (Tables 3 and 4). A notable exception is the genu of the corpus callosum where the increase in fractional anisotropy seems mainly driven by an increase in axial diffusivity. Following the pattern observed in individual fiber bundles, mean fractional anisotropy in pure white matter increased from 0.40 to 0.41 (3.0%,  $p < 0.001$ ). This increase can be attributed to a decrease in radial diffusivity.

## The Relation between White Matter Volume and Fractional Anisotropy

There was no significant correlation between white matter volume and mean fractional anisotropy in pure white matter at either baseline or follow-up, or between white matter volume and mean pure white matter radial or axial diffusivity ( $p's > 0.21$ ). However, there was a strong negative correlation between the relative volumetric white matter growth and the relative fractional anisotropy increase ( $r_p = -0.62$ ,  $p < 0.001$ , see Figure 3). This correlation is a reflection of the associations between the relative volumetric white matter change and relative radial diffusivity change ( $r_p = 0.45$ ,  $p < 0.001$ ) and relative axial diffusivity change ( $r_p = -0.47$ ,  $p < 0.001$ ). Next, we investigated the relation between the baseline measurement and subsequent changes. The baseline measurement of white matter volume predicted the relative increase in fractional anisotropy over time ( $r_p = 0.27$ ,  $p = 0.013$ ). Similarly, mean fractional anisotropy at age 9 predicted the relative increase in white matter volume.

## White Matter Surface Area Expansion and the Relation to Fractional Anisotropy

White matter surface area increased by 1.7% ( $p < 0.001$ ) between ages 9 and 12. Surface area expansion was larger in the left hemisphere than in the right hemisphere ( $p = 0.03$ ). Relative white matter volume increase correlated with relative white matter surface area expansion ( $r_p = 0.89$ ;  $p < 0.001$ ). At a lobar level, all lobar white matter surface areas, apart from the occipital surface area bilaterally, increased significantly ( $p's < 0.02$ , frontal left 1.7%, frontal right 1.2%, parietal left 2.2%, parietal right 2.1%, temporal left 2.1%, temporal right 1.1%, occipital left 0.7%, occipital 0.5%). Figure 4 displays the percentage change in white matter surface area per anatomical cortical region.

## Sex Differences

Boys had a larger white matter volume than girls at both age 9 and 12 ( $p's < 0.001$ ). There were no differences in absolute or

**Table 1.** Sample characteristics of the full sample (left) and of the subset of children for which longitudinal data was available (right).

|                              | Full sample |         | Longitudinal sample |         | p-value       |
|------------------------------|-------------|---------|---------------------|---------|---------------|
|                              | Age 9       | Age 12  | Age 9               | Age 12  |               |
| Number of twin subjects      | 203         | 126     | 121                 | 121     |               |
| (MZ / DZ)                    | (88/115)    | (59/87) | (57/64)             | (57/64) | 0.20          |
| Mean age                     | 9.2         | 12.1    | 9.2                 | 12.1    | 0.17 (age 9)  |
| (sd) in years                | (0.11)      | (0.24)  | (0.11)              | (0.25)  | 0.68 (age 12) |
| Sex (boy/girl)               | 101/102     | 64/62   | 63/58               | 63/58   | 0.33          |
| Handedness (R/non-R)         | 171/32      | 105/21  | 101/20              | 101/20  | 0.85          |
| Mean FA in pure WM           | 0.401       | 0.413   | 0.401               | 0.414   | 0.59 (age 9)  |
| (sd) */**                    | (0.02)      | (0.02)  | (0.02)              | (0.02)  | 0.69 (age 12) |
| Mean WM volume               | 512.9       | 543.8   | 517.3               | 544.3   | 0.24 (age 9)  |
| (sd) in ml */**              | (57.9)      | (63.3)  | (59.7)              | (62.3)  | 0.83 (age 12) |
| Mean WM surface area         | 1908.6      | 1940.1  | 1913.5              | 1939.6  | 0.67 (age 9)  |
| (sd) in cm <sup>2</sup> */** | (177.7)     | (179.4) | (182.8)             | (180.5) | 0.94 (age 12) |

MZ = monozygotic, DZ = dizygotic, FA = fractional anisotropy, R = right-handed, WM = white matter.

\*White matter was segmented reliably in 187 children at baseline, and 117 children at follow-up.

\*\*105 children had reliable white matter segmentations and DTI measurements at both time-points. The last column displays p-values of the differences in sample characteristics for children who participated only once, versus children who participated twice.

doi:10.1371/journal.pone.0032316.t001

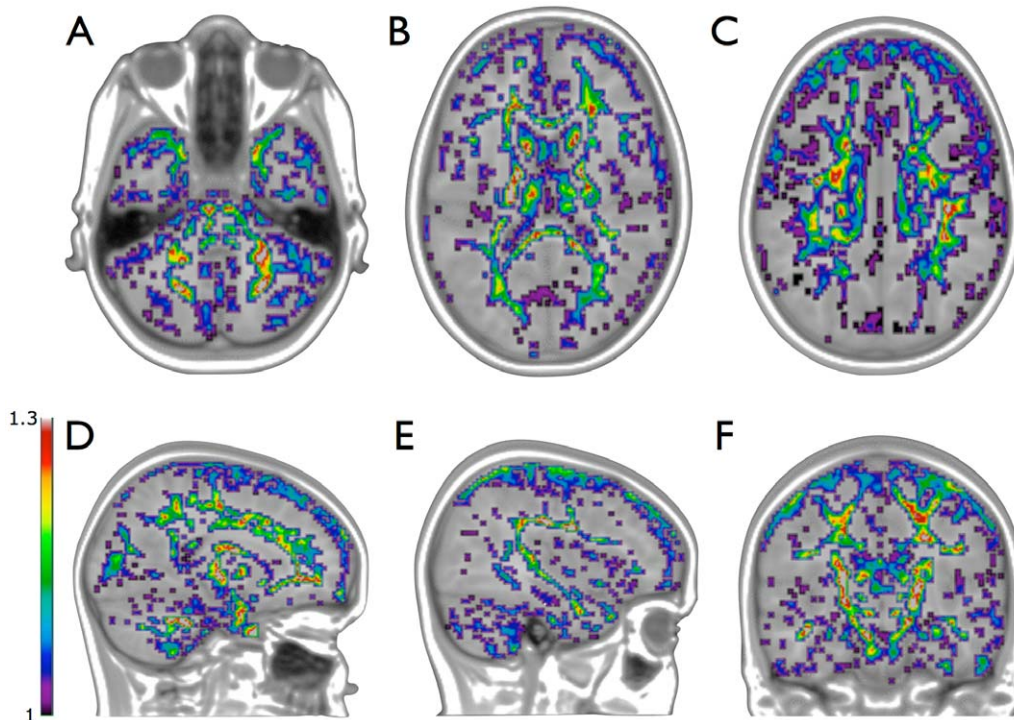

**Figure 1. Significant tissue expansion: Significant Jacobian values > 1 overlaid on the model brain.** Values range from 1.02 (purple) to 1.30 (bright red). Expansion was observed in regions covering the arcuate fasciculus (E), cerebellar peduncle (A), cinguli (C), corpus callosum (B,C), cortical spinal tract (B,F), uncinate fasciculus (D) and on the gray matter / cerebral spinal fluid boundary (A-F), the latter likely representing brain growth. For visualization purposes, values were resampled to model brain resolution.  
doi:10.1371/journal.pone.0032316.g001

**Table 2. Fractional anisotropy in 9 and 12 year old children.**

|                   | N   | 9 years     | 12 years    | p       | Change |
|-------------------|-----|-------------|-------------|---------|--------|
| Pure white matter | 105 | 0.40 (0.03) | 0.41 (0.02) | <0.0001 | +3.0%  |
| Arcuate L         | 117 | 0.48 (0.03) | 0.50 (0.03) | <0.0001 | +4.6%  |
| Arcuate R         | 99  | 0.48 (0.03) | 0.50 (0.03) | <0.0001 | +5.3%  |
| Cingulum L        | 83  | 0.50 (0.06) | 0.52 (0.05) | 0.0120  | +3.2%  |
| Cingulum R        | 74  | 0.45 (0.06) | 0.48 (0.06) | <0.0001 | +6.9%  |
| Fornix L          | 114 | 0.34 (0.03) | 0.36 (0.03) | <0.0001 | +4.9%  |
| Fornix R          | 111 | 0.34 (0.03) | 0.35 (0.03) | <0.0001 | +4.7%  |
| Genu              | 121 | 0.61 (0.03) | 0.62 (0.03) | 0.0052  | +1.3%  |
| IFO L             | 120 | 0.51 (0.03) | 0.52 (0.03) | 0.0002  | +2.6%  |
| IFO R             | 121 | 0.48 (0.03) | 0.50 (0.03) | <0.0001 | +3.7%  |
| ILF L             | 121 | 0.48 (0.03) | 0.49 (0.03) | <0.0001 | +3.1%  |
| ILF R             | 121 | 0.48 (0.03) | 0.49 (0.03) | <0.0001 | +4.2%  |
| Splenium          | 121 | 0.60 (0.04) | 0.63 (0.04) | <0.0001 | +5.5%  |
| Uncinate L        | 113 | 0.45 (0.03) | 0.46 (0.03) | <0.0001 | +3.1%  |
| Uncinate R        | 120 | 0.43 (0.03) | 0.45 (0.03) | <0.0001 | +3.2%  |

Means and standard deviations are given from the longitudinal sample only. L = left, R = right, ILF = inferior longitudinal fasciculus, IFO = inferior fronto-occipital fasciculus. P-values are the result of paired t-tests comparing fractional anisotropy at 9 and 12 years. N represents the number of children included in the paired t-test.  
doi:10.1371/journal.pone.0032316.t002

relative volumetric white matter increase between boys and girls ( $p's > 0.30$ ). Sex also had no significant effect on local volumetric change, as was measured with deformation based morphometry.

There were no differences in global or lobular white matter surface expansion between boys and girls. Locally, girls had a larger expansion in the right inferior temporal area ( $p = 0.006$ ) and right medial-orbito frontal area ( $p = 0.04$ ) and right paracentral lobule ( $p = 0.003$ ). Considering white matter microstructure, girls had a slightly higher mean fractional anisotropy in pure white matter than boys at age 9 (0.405 versus 0.397,  $p = 0.022$ ), but this difference disappeared at age 12. There was no difference in absolute or relative mean fractional anisotropy in pure white matter increase between boys and girls ( $p's > 0.21$ ). The relationship between fractional anisotropy increase and white matter volumetric increase did not change when correcting for sex, nor when considering boys and girls separately.

### Genetic Analyses

Genetic influences were found for white matter volume (86%/85%), white matter surface area (83%/85%) and microstructural measures (7–54%/15–49%) at baseline and follow-up (see Table 5). Relative change in white matter volume and surface area, and relative change in fractional anisotropy over the three-year interval were not significantly influenced by genes. Instead, the correlation between relative white matter change and relative pure white matter fractional anisotropy change was completely explained by environmental factors ( $r_e = -0.67$ ; confidence interval  $(-0.80, -0.48)$ ), influencing both white matter growth and fractional anisotropy changes.

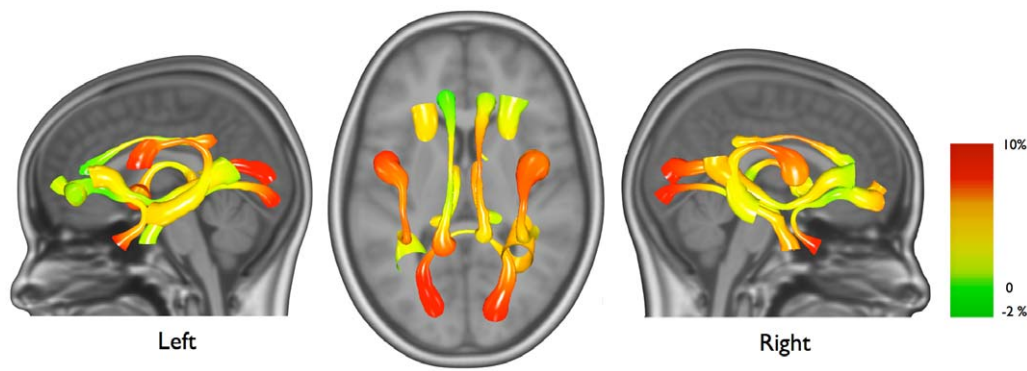

**Figure 2. Increases of relative fractional anisotropy between the ages of 9 and 12, projected onto the group average fiber bundle.** Left, top and right view. For visualization purposes, values were smoothed along the bundle using LOESS [59].  
doi:10.1371/journal.pone.0032316.g002

### Post-hoc Analysis: Histogram Comparisons

Figure 5 shows histograms at age 9 and age 12 for children with relatively large, and relatively small white matter growth. As can be seen from this Figure, in neither group, the amount of voxels with low fractional anisotropy (possibly representing regions of crossing fibers) substantially differs between ages. A difference in mean white matter fractional anisotropy arises from a shift in the histogram to the right. This shift is larger in the group of children with relatively small volumetric white matter increase.

### Discussion

In this study we explored the local and global changes in white matter of the brain and how these changes are associated in children between 9 and 12 years of age. We find that white matter

volume increases (on average 6.0%), white matter surface area expands (on average 1.7%), and thickening and lengthening of fiber bundles occurs, during this three-year period. All fiber bundles showed an increase in their fractional anisotropy with increasing age (1.3% to 6.9%). Genes influence white matter volume (>80%), white matter surface (>80%) and fractional anisotropy in fiber bundles (up to 54%). The developmental changes in white matter volume and microstructure were explained by some (unknown) unique environmental factor.

We found white matter surface area expansion in the frontal, parietal and temporal lobes, between 9 and 12 years of age. Our findings at two specific ages helps to localize, in both space and time, the increase in white matter volume [1], mean surface area [39] and expansion of fiber bundles [40–41] that have been shown to occur in childhood and adolescence. Simultaneously, fractional

**Table 3. Longitudinal diffusivity ( $\lambda_1$ ;  $\times 10^{-3}$  mm<sup>2</sup>/s) in 9 and 12 year old children.**

|                   | N   | 9 years       | 12 years      | p      | Change |
|-------------------|-----|---------------|---------------|--------|--------|
| Pure white matter | 105 | 1.139 (0.032) | 1.143 (0.028) | 0.227  | +0.4%  |
| Arcuate L         | 117 | 1.199 (0.052) | 1.199 (0.044) | 0.752  | -0.1%  |
| Arcuate R         | 99  | 1.180 (0.051) | 1.193 (0.055) | 0.014  | +1.2%  |
| Cingulum L        | 83  | 1.209 (0.085) | 1.245 (0.079) | 0.001  | +3.0%  |
| Cingulum R        | 74  | 1.163 (0.078) | 1.210 (0.093) | <0.001 | +4.0%  |
| Fornix L          | 114 | 1.360 (0.119) | 1.372 (0.136) | 0.389  | +0.9%  |
| Fornix R          | 111 | 1.375 (0.195) | 1.387 (0.156) | 0.575  | +0.8%  |
| Genu              | 121 | 1.351 (0.063) | 1.390 (0.045) | <0.001 | +2.8%  |
| IFO L             | 120 | 1.251 (0.054) | 1.269 (0.046) | 0.002  | +1.4%  |
| IFO R             | 121 | 1.229 (0.055) | 1.267 (0.048) | <0.001 | +2.2%  |
| ILF L             | 121 | 1.314 (0.074) | 1.323 (0.061) | 0.152  | +0.8%  |
| ILF R             | 121 | 1.318 (0.068) | 1.336 (0.057) | 0.002  | +1.4%  |
| Splenium          | 121 | 1.582 (0.086) | 1.612 (0.084) | <0.001 | +2.2%  |
| Uncinate L        | 113 | 1.185 (0.050) | 1.203 (0.039) | 0.001  | +1.5%  |
| Uncinate R        | 120 | 1.177 (0.050) | 1.199 (0.044) | <0.001 | +1.9%  |

Means and standard deviations are given from the longitudinal sample only. L = left, R = right, ILF = inferior longitudinal fasciculus, IFO = inferior fronto-occipital fasciculus. P-values are the result of paired t-tests comparing  $\lambda_1$  at 9 and 12 years. N represents the number of children included in the paired t-test.  
doi:10.1371/journal.pone.0032316.t003

**Table 4. Radial diffusivity ( $\lambda_{23}$ ;  $\times 10^{-3}$  mm<sup>2</sup>/s) in 9 and 12 year old children.**

|                   | N   | 9 years       | 12 years      | p      | Change |
|-------------------|-----|---------------|---------------|--------|--------|
| Pure white matter | 105 | 0.596 (0.021) | 0.584 (0.018) | <0.001 | -2.1%  |
| Arcuate L         | 117 | 0.542 (0.028) | 0.520 (0.027) | <0.001 | -4.0%  |
| Arcuate R         | 99  | 0.535 (0.028) | 0.516 (0.027) | <0.001 | -4.0%  |
| Cingulum L        | 83  | 0.506 (0.044) | 0.503 (0.037) | 0.459  | -0.6%  |
| Cingulum R        | 74  | 0.544 (0.053) | 0.533 (0.045) | 0.010  | -2.6%  |
| Fornix L          | 114 | 0.811 (0.088) | 0.789 (0.098) | 0.030  | -2.7%  |
| Fornix R          | 111 | 0.830 (0.135) | 0.813 (0.105) | 0.278  | -1.9%  |
| Genu              | 121 | 0.433 (0.037) | 0.439 (0.030) | 0.067  | -1.3%  |
| IFO L             | 120 | 0.531 (0.033) | 0.520 (0.028) | 0.001  | -1.9%  |
| IFO R             | 121 | 0.552 (0.034) | 0.541 (0.027) | <0.001 | -1.9%  |
| ILF L             | 121 | 0.591 (0.040) | 0.577 (0.045) | 0.003  | -2.3%  |
| ILF R             | 121 | 0.597 (0.045) | 0.579 (0.040) | <0.001 | -3.0%  |
| Splenium          | 121 | 0.547 (0.069) | 0.513 (0.061) | <0.001 | -6.3%  |
| Uncinate L        | 113 | 0.563 (0.031) | 0.555 (0.025) | 0.002  | -1.6%  |
| Uncinate R        | 120 | 0.574 (0.030) | 0.568 (0.026) | 0.008  | -1.0%  |

Means and standard deviations are given from the longitudinal sample only. L = left, R = right, ILF = inferior longitudinal fasciculus, IFO = inferior fronto-occipital fasciculus. P-values are the result of paired t-tests comparing  $\lambda_{23}$  at 9 and 12 years. N represents the number of children included in the paired t-tests.  
doi:10.1371/journal.pone.0032316.t004

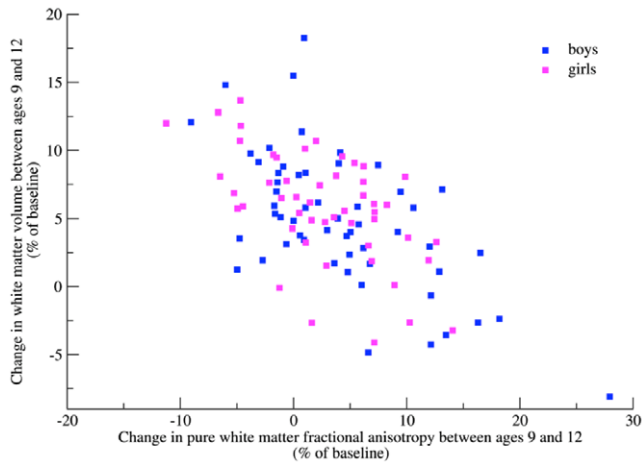

**Figure 3. The relationship between changes in pure white matter fractional anisotropy and changes in white matter volume in the three-year interval.**  
doi:10.1371/journal.pone.0032316.g003

anisotropy increased in all the 14 major fiber bundles that we studied. Different rates of maturation have been suggested for different fiber bundles (e.g. [15][42–43]) Our narrow age range makes it possible to pinpoint the changes that occur in a very specific time window. However, it does not allow for testing developmental trajectories over longer age-periods. The increases in fractional anisotropy found in our study are overall more widespread than those that have been found in voxel-based longitudinal studies in late adolescence and young adulthood [13–14]. As these studies were done in somewhat older samples (age ranges [16–21] and [14–19], respectively), it is possible that white matter microstructure is developing at a rather global level in

children at the brink of puberty and that only later, during puberty, differentiation in the developmental pattern occurs. However, the recent longitudinal tract-based study in subjects aged 5–32 years, showed an age-related increase in 10 of the major fiber bundles [15] which is in line with our findings. Thus, we conclude that widespread age-related increases in fractional anisotropy occur between 9 and 12-years of age, although the extent is more prominent in some fiber bundles than in others.

The left arcuate fasciculus was the most prominently expanding fiber bundle of the 14 cortico-cortical fiber bundles between 9 and 12 years of age. Since the arcuate fasciculus is a bundle that is involved in language processing and young children have great potential to acquire new languages, we may speculate that the strengthening of the arcuate fasciculus is related to a stabilization of language skills. Indeed, the ability to acquire new languages diminishes fast after the age of 10 [44]. In addition, in the present study, prominent expansion was found in the splenium of the corpus callosum. The splenium contains the tracts involved in visual-spatial processing, which may be expected to develop early in life. Nevertheless, other studies too show prominent expansion in late childhood and young adolescence [45] and increases in fractional anisotropy until early adolescence [9]. It may be that the expansion occurring in our sample is related to bimanual coordination: during adolescence, both bimanual task performance and fractional anisotropy in the splenium increases [46].

Most likely, the continued expansion of white matter in childhood represents an increase in connectivity and reorganization throughout the brain. Based on post-mortem studies [47–48] the increase in white matter volume is usually attributed to an increase in myelin (but see [49]), thus representing an improvement in the speed of connections between anatomically distant brain areas. Our results indicate that white matter growth and fractional anisotropy increase cannot both be solely linked to myelination. While fractional anisotropy correlates with the thickness of myelin sheet [50–51], other factors such as

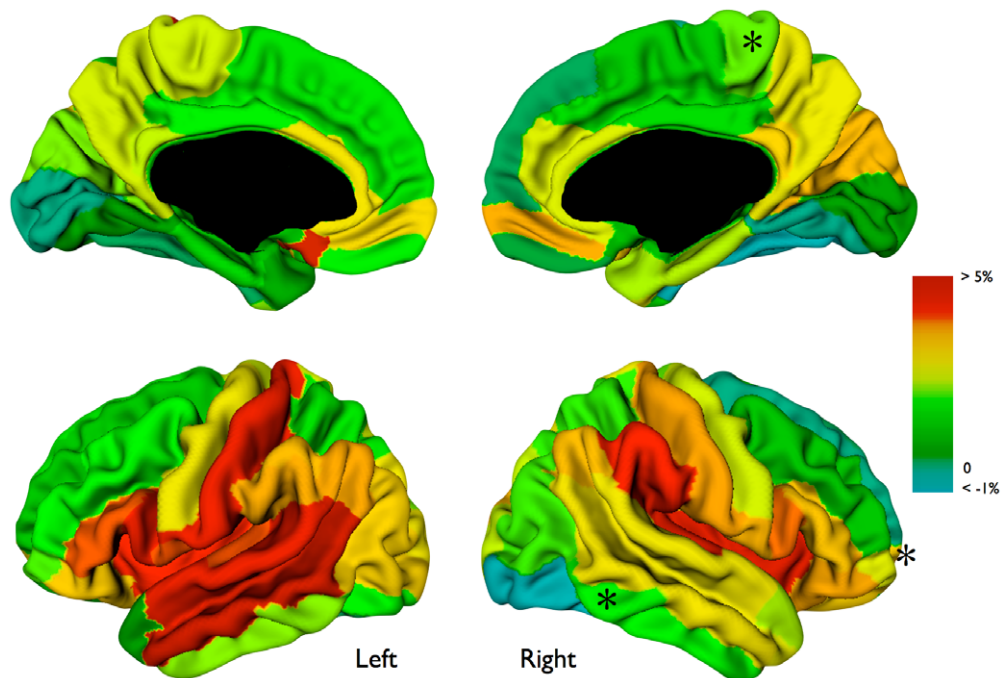

**Figure 4. Relative white matter surface area expansion of AAL regions in the left and right hemisphere.** Please note that expansion is based (and projected on) AAL regions rather than representing continuous expansion. \*Areas in which girls had larger expansion than boys.  
doi:10.1371/journal.pone.0032316.g004

**Table 5.** Heritability and unique environmental influences for white matter volume, mean fractional anisotropy in pure white matter, white matter surface area and fractional anisotropy in fiber bundles at ages 9 and 12.

|                           | 9 years          |                        | 12 years         |                        |
|---------------------------|------------------|------------------------|------------------|------------------------|
|                           | Heritability (%) | Unique environment (%) | Heritability (%) | Unique environment (%) |
| White matter volume       | 86 [78–92]       | 14 [8–22]              | 85 [73–92]       | 15 [8–27]              |
| Mean pure white matter FA | 24 [1–49]        | 76 [51–99]             | 33 [3–59]        | 67 [41–97]             |
| White matter surface area | 83 [71–89]       | 17 [11–29]             | 86 [74–92]       | 14 [8–26]              |
| FA Arcuate L              | 54 [32–71]       | 46 [29–68]             | 42 [16–64]       | 58 [36–84]             |
| FA Arcuate R              | 34 [9–58]        | 66 [42–91]             | 31 [6–58]        | 69 [42–94]             |
| FA cingulum L             | 51 [24–71]       | 49 [29–76]             | 36 [9–61]        | 64 [39–91]             |
| FA cingulum R             | 54 [28–71]       | 46 [29–72]             | 35 [13–58]       | 65 [42–87]             |
| FA fornix L               | 18 [3–41]        | 82 [59–97]             | 29 [6–53]        | 71 [47–94]             |
| FA fornix R               | 21 [5–40]        | 79 [60–95]             | 39 [13–62]       | 61 [38–87]             |
| FA genu                   | 28 [5–51]        | 72 [49–95]             | 38 [9–61]        | 62 [39–91]             |
| FA ILF L                  | 28 [7–50]        | 72 [50–93]             | 21 [2–47]        | 79 [53–98]             |
| FA ILF R                  | 37 [12–61]       | 63 [39–88]             | 49 [19–70]       | 51 [30–81]             |
| FA IFO L                  | 7 [0–27]         | 93 [73–100]            | 15 [1–38]        | 85 [62–99]             |
| FA IFO R                  | 22 [3–48]        | 78 [52–97]             | 35 [6–62]        | 65 [38–94]             |
| FA splenium               | 42 [21–60]       | 58 [40–79]             | 42 [19–61]       | 58 [39–81]             |
| FA uncinate L             | 22 [3–45]        | 78 [55–97]             | 44 [15–67]       | 56 [33–85]             |
| FA uncinate R             | 27 [2–51]        | 73 [49–98]             | 37 [10–62]       | 63 [38–90]             |

Values in brackets are 95% confidence intervals. Common environmental influences did not play a role in explaining variation in fiber bundles (based on both the Akaike criterion and Chi-square differences): only the results from the model incorporating genetic and unique environmental influences are displayed here. FA = fractional anisotropy, L = left, R = right, ILF = inferior longitudinal fasciculus, IFO = inferior fronto-occipital fasciculus.

doi:10.1371/journal.pone.0032316.t005

compactness and organization of fiber bundles, and axonal diameter and density play a more prominent role (e.g. [52–55]). In the mouse-model of the shiverer mouse that lacks myelin,

fractional anisotropy is less affected by dysmyelination than other diffusion parameters, such as the trace [56]. Although we can only speculate as to the underlying physiological processes underlying

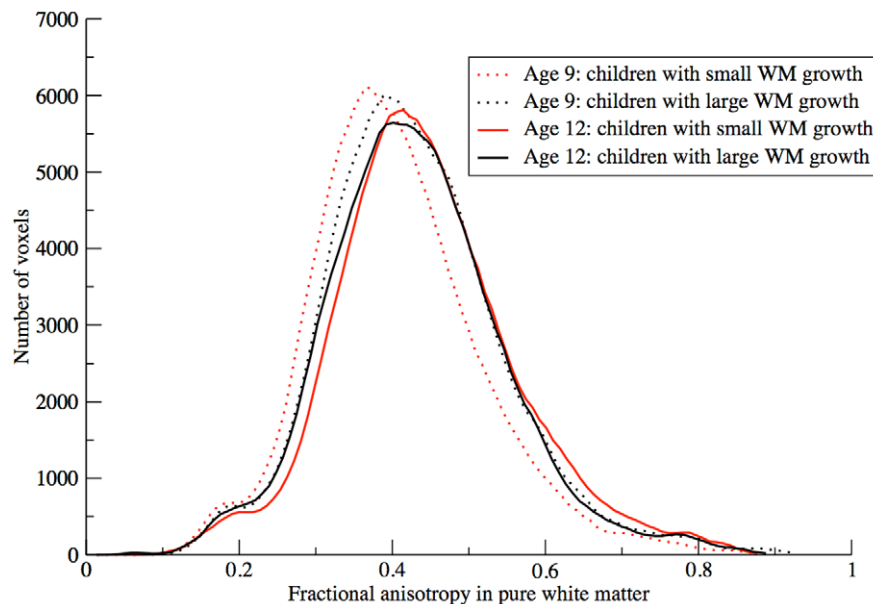

**Figure 5. Histograms of fractional anisotropy in pure white matter at age 9 and age 12.** In the 14 children with relatively large volumetric white matter growth mean fractional anisotropy was 0.43 at both ages. In 13 children with relatively small volumetric white matter growth, mean fractional anisotropy increased from 0.41 to 0.44.

doi:10.1371/journal.pone.0032316.g005



the development of white matter volume and microstructure, we hypothesize that the thickening of fiber bundles is not only the result from an increase of myelination, but also from an increase of axonal diameter and/or changes in the extracellular space. The latter two may negatively influence fractional anisotropy and their effects may temper the possible increase in fractional anisotropy due to increased myelination. Indeed, in pubertal rats, fractional anisotropy is positively correlated with the area of myelin sheath, but negatively with the extracellular space [51]. Thus, the negative correlation between white matter growth and fractional anisotropy increase indicates that (at least) two different biological processes occur during white matter development. Myelination is likely one of them, but other processes influencing coherence of axonal bundles must also play a role. Future studies are warranted to investigate the relation between changes in white matter volume/surface area and fractional anisotropy at a local level.

White matter volume in 8 and 9 year old children is highly heritable [18][57]. We show here for the first time that white matter surface area is also strongly influenced by genes. There are only two studies investigating genetic influences in white matter microstructure during puberty and adolescence: our previous study in the same cohort of 9-year olds showed moderate genetic influences in several of the major fiber bundles [19]. A recent cross-sectional study comparing adolescents (12 and 16 year olds) to adults showed larger influences of genetic factors on fractional anisotropy in the younger group, indicating that heritability of white matter microstructure decreases with age, or environment increases its influence during life [58]. In our longitudinal study we did not find this decrease in heritability, possibly due to our younger age, and much shorter time interval. The developmental changes in white matter volume and microstructure were explained by some (unknown) unique environmental factor.

## References

- Giedd JN, Blumenthal J, Jeffries NO, Castellanos FX, Liu H, et al. (1999) Brain development during childhood and adolescence: a longitudinal MRI study. *Nat Neurosci*, Vol 2, 861–3.
- Bartzokis G, Beckson M, Lu PH, Nuechterlein KH, Edwards N, et al. (2001) Age-related changes in frontal and temporal lobe volumes in men: a magnetic resonance imaging study. *Arch Gen Psychiatry*, 58(5), 461–5.
- Brans RG, Kahn RS, Schnack HG, van Baal GC, Posthuma D, et al. (2010) Brain plasticity and intellectual performance are influenced by shared genes. *J Neurosci*, 30, 5519–24.
- Sowell ER, Thompson PM, Leonard CM, Welcome SE, Kan E, et al. (2004) Longitudinal mapping of cortical thickness and brain growth in normal children. *J Neurosci*, Sep 22; 24(38): 8223–31.
- van Soelen ILC, Brouwer RM, van Baal GC, Schnack HG, Peper JS, et al. (2011) Genetic influences on thinning of the cerebral cortex during development. *NeuroImage*, Epub ahead of print.
- Le Bihan D, Mangin JF, Poupon C, Clark CA, Pappata S, et al. (2001) Diffusion Tensor Imaging: Concepts and Applications. *J Mag Res Imag*, Vol 13, 534–46.
- Basser PJ, Pierpaoli C (1996) Microstructural and physiological features of tissues elucidated by quantitative-diffusion-tensor MRI. *J Magn Reson B*, Vol 111, 209–19.
- Asato MR, Terwilliger R, Woo J, Luna B (2010) White matter development in adolescence: A DTI study. *Cereb Cortex*, 20: 2122–31.
- Lebel C, Caverhill-Godkewitsch S, Beaulieu C (2010) Age-related regional variations of the corpus callosum identified by diffusion tensor tractography. *NeuroImage*, 52, 20–31.
- Cascio CJ, Gerig G, Piven J (2007) Diffusion Tensor Imaging: Application to the study of the developing brain. *J. Am. Acad. Child Adolesc. Psychiatry*, 46:2, 213–23.
- Schmithorst VJ, Yuan W (2010) White matter development during adolescence as shown by diffusion MRI. *Brain and Cognition* 72, 16–25.
- Ladouceur CD, Peper JS, Crone EA, Dahl RE (2011) White matter development in adolescence: The influence of puberty and implications for affective disorders. *Dev Cogn Neurosci*, Jan 1, 2(1), 36–54.
- Bava S, Thayer R, Jacobus J, Ward M, Jernigan TL, et al. (2010) Longitudinal characterization of white matter maturation during adolescence. *Brain Research* 1327, 38–46.
- Giorgio A, Watkins KE, Chadwick M, James S, Winmill L, et al. (2010) Longitudinal changes in grey and white matter during adolescence. *NeuroImage*, Vol 49, 94–103.
- Lebel C, Beaulieu C (2011) Longitudinal development of human brain wiring continues from childhood into adulthood. *J Neurosci*. 2011 Jul 27; 31(30): 10937–47.
- Tamnes CK, Østby Y, Fjell AM, Westlye AT, Due-Tønnessen P, et al. (2010) Brain Maturation in Adolescence and Young Adulthood: Regional Age-Related Changes in Cortical Thickness and White Matter Volume and Microstructure. *Cereb Cortex*, 20: 534–48.
- Boomsma DI, de Geus EJ, Vink JM, Stubbe JH, Distel MA, et al. (2006) Netherlands Twin Register: from twins to twin families. *Twin Res Hum Genet*. Vol 9, no 6, 849–57.
- Peper JS, Schnack HG, Brouwer RM, van Baal GCM, Pjeteri E, et al. (2009) Heritability of regional and global brain structure at the onset of puberty: a Magnetic Resonance Imaging study in 9-year old twin pairs. *Human Brain Mapp*. 30: 2184–96.
- Brouwer RM, Mandl RC, Peper JS, van Baal GC, Kahn RS, et al. (2010) Heritability of DTI and MTR in nine-year-old children. *Neuroimage*, Nov 15; 53(3): 1085–92.
- Andersson JLR, Skare S (2002) A model-based method for retrospective correction of geometric distortions in diffusion-weighted EPI. *NeuroImage*, Vol 16, 177–99.
- Chang L, Jones DK, Pierpaoli C (2005) RESTORE: Robust Estimation of Tensors by Outlier Rejection. *Magn Reson Med*, Vol 53, 1088–95.
- Brouwer RM, Hulshoff Pol HE, Schnack HG (2010) Segmentation of MRI brain scans using non-uniform partial volume densities. *Neuroimage*, Jan 1; 49(1): 467–77.
- Maes F, Collignon A, Vandermeulen D, Marchal G, Suetens P (1997) Multimodality image registration by maximization of mutual information. *IEEE Trans Med Imag* 16, 187–98.
- Collins DL, Holmes CJ, Peters TM, Evans AC (1995) Automatic 3-D model-based neuroanatomical segmentation. *Hum Brain Mapp* 4, 190–208.
- Peper JS, Brouwer RM, Schnack HG, van Baal GC, van Leeuwen M, et al. (2008) Cerebral white matter in early puberty is associated with luteinizing hormone concentrations. *Psychoneuroendocrinology* 33: 909–15.
- Genovese CR, Lazar NA, Nichols T (2002) Thresholding of statistical maps in functional neuroimaging using the false discovery rate. *NeuroImage* 15, 870–8.
- Gerig G, Goutard S, Corouge I (2004) Analysis of brain white matter via fiber tract modeling. *Conf Proc IEEE Eng Med Biol Soc* 6, 4421–24.
- Mandl RC, Schnack HG, Luijckes J, van den Heuvel MP, Cahn W, et al. (2010) Tract-based analysis of magnetization transfer ratio and diffusion tensor imaging

Whereas unique environmental factors always include measurement error, the existence of an environmental correlation (and the fact that both measurements were obtained from a different scan) shows that there must be some external factor influencing both white matter growth and increase in anisotropy of fiber bundles. Considering the growing importance of the unique environment on children once they reach puberty, the white matter changes may reflect adaptation of the brain at this age.

## Acknowledgments

We thank all twin families for their participation.

## Supporting Information

**Figure S1 Figure S1. Significant tissue contraction: Significant Jacobian values <1 overlaid on the model brain (axial and coronal slice).** Values range from 0.98 (purple) to 0.70 (red). Contraction occurs around the ventricles and in gray matter at the gray/white matter boundary. We interpret this as representing enlargement of ventricles and cortical thinning, both of which have been shown in this sample [5][36]. For visualization purposes, values were resampled to model brain resolution.

(TIFF)

## Author Contributions

Conceived and designed the experiments: HEH DIB RSK. Performed the experiments: JSP ILCvS. Analyzed the data: RMB. Contributed reagents/materials/analysis tools: RMB RCWM HGS GCvB. Wrote the paper: RMB RCWM HGS ILCvS JSP GCvB RSK DIB HEH.

- of the frontal and frontotemporal connections in schizophrenia. *Schizophr. Bull.* 36, 778–87.
29. Mori S, van Zijl PC (2002) Fiber tracking: principles and strategies – a technical review. *NMR Biomed* 15, 468–80.
  30. Mori S, Kaufmann WE, Davatzikos C, Stieltjes B, Amodei L, et al. (2002) Imaging cortical association tracts in the human brain using diffusion-tensor-based axonal tracking. *Magn Reson Med* 47, 215–23.
  31. Kim JS, Singh V, Lee JK, Lerch J, Ad-Dab'bagh Y, et al. (2005) Automated 3-D extraction and evaluation of the inner and outer cortical surfaces using a Laplacian map and partial volume effect classification. *NeuroImage* 27, 210–21.
  32. Lerch JP, Pruessner J, Zijdenbos AP, Collins DL, Teipel SJ, et al. (2008) Automated cortical thickness measurements from MRI can accurately separate Alzheimer's patients from normal elderly controls. *Neurobiol Aging* 29, 23–30.
  33. Tzourio-Mazoyer N, Landeau B, Papathanassiou D, Crivello F, Etard O, et al. (2002) Automated anatomical labeling of activations in SPM using a macroscopic anatomical parcellation of the MNI MRI single-subject brain. *NeuroImage* 15, 273–89.
  34. Falconer DS, Mackay TFC (1996) *Introduction to Quantitative genetics*. (Fourth ed.) London: Prentice Hall.
  35. Boomsma DI, Busjahn A, Peltonen L (2002) Classical twin studies and beyond. *Nat Rev Genet* 3: 872–82.
  36. van Soelen ILC, Brouwer RM, van Baal GCM, Schnack HG, Peper JS, et al. (2011) Heritability of volumetric changes during brain development. *Hum Brain Mapp*, Dec 3: doi: 10.1002/hbm.21468.
  37. Neale MC, Cardon LR (1992) *Methodology for Genetic Studies of Twins and Families*. Kluwer Academic Publishers, Dordrecht.
  38. Neale MC, Boker SM, Xie G, Maes HH (2006) 'Mx: statistical modeling', VCU Box 900126, Richmond, VA 23298: Department of Psychiatry, 7th Edition.
  39. Raznahan A, Shaw P, Lalonde F, Stockman M, Wallace GL, et al. (2011) How does your cortex grow? *J Neurosci.* 2011 May 11; 31(19): 7174–7.
  40. Gogtay N, Lu A, Leow AD, Klunder AD, Lee AD, et al. (2008) Three-dimensional brain growth abnormalities in childhood-onset schizophrenia visualized by using tensor-based morphometry. *Proc Natl Acad Sci U S A*, Oct 14; 105(41): 15979–84.
  41. Hua X, Leow AD, Levitt JG, Caplan R, Thompson PM, et al. (2009) Detecting Brain Growth Patterns in Normal Children using Tensor-Based Morphometry. *Hum Brain Mapp*, 30(1), 209–19.
  42. Lebel C, Walker L, Leemans A, Phillips L, Beaulieu C (2008) Microstructural maturation of the human brain from childhood to adulthood. *NeuroImage*, Vol 40, 1044–55.
  43. Imperati D, Colcombe S, Kelly C, Di Martino A, Zhou J, et al. (2011) Differential Development of Human Brain White Matter Tracts. *PLoS One*, 6(8): e23437. doi:10.1371/journal.pone.0023437.
  44. Johnson JS, Newport EL (1989) Critical period effects in second language learning: the influence of maturational state on the acquisition of English as a second language. *Cogn Psychol* 21, 60–99.
  45. Thompson PM, Giedd JN, Woods RP, MacDonald D, Evans AC, et al. (2000) Growth patterns in the developing brain detected by using continuum mechanical tensor maps. *Nature*, Vol 404, 190–3.
  46. Muetzel RL, Collins PF, Mueller BA, Schissel AM, Lim KO, et al. (2008) The development of corpus callosum microstructure and associations with bimanual task performance in healthy adolescents. *NeuroImage* 39 (4), 1918–25.
  47. Yakovlev PA, Lecours IR (1967) *Regional development of the brain in early life*. Oxford: Blackwell.
  48. Benes FM, Turtle M, Khan Y, Farol P (1994) Myelination of a key relay zone in the hippocampal formation occurs in the human brain during childhood, adolescence, and adulthood. *Arch Gen Psychiatry*, Jun 51(6), 477–84.
  49. Perrin JS, Hervé PY, Leonard G, Perron M, Pike GB, et al. (2008) Growth of white matter in the adolescent brain: role of testosterone and androgen receptor. *J. Neuroscience*, 28(38): 9519–24.
  50. Gulani V, Webb AG, Duncan ID, Lauterbur PC (2001) Apparent diffusion tensor measurements in myelin-deficient rat spinal cords. *Magn. Reson. Med.* 45, 191–5.
  51. Jito J, Nakasu S, Ito R, Fukami T, Morikawa S, et al. (2008) Maturation Changes in Diffusion Anisotropy in the Rat Corpus Callosum: Comparison with Quantitative Histological Evaluation. *J. Magn Reson Imag* 28, 847–54.
  52. Alexander AL, Hasan KM, Lazar M, Tsuruda JS, Parker DL (2001) Analysis of partial volume effects in diffusion-tensor MRI. *Magn Reson Med* 45, 770–80.
  53. McGraw P, Liang L, Provenzale JM (2002) Evaluation of normal age-related changes in anisotropy during infancy and childhood as shown by diffusion tensor imaging. *AJR Am J Roentgenol* Dec 179(6), 1515–22.
  54. Beaulieu C (2002) The basis of anisotropic water diffusion in the nervous system – a technical review. *NMR Biomed*, Vol 15, 435–55.
  55. Mädlar B, Drabycz SA, Kolind SH, Whittall KP, MacKay A (2008) Is diffusion anisotropy an accurate monitor of myelination? Correlation of multicomponent T2 relaxation and diffusion tensor anisotropy in human brain. *NeuroImage* 26, 874–88.
  56. Tyska JM, Readhead C, Bearer EL, Pautler RG, Jacobs RE (2006) Statistical diffusion tensor histology reveals regional dysmyelination effects in the shiverer mouse mutant. *NeuroImage*, Vol 29 (4), 1058–65.
  57. Yoon U, Fahim C, Perusse D, Evans AC (2010) Lateralized genetic and environmental influences on human brain morphology of 8-year-old twins. *NeuroImage*, Nov 15; 53(3): 1117–25.
  58. Chiang MC, McMahon KL, de Zubicaray GI, Martin NG, Hickie I, et al. (2011) Genetics of white matter development: A DTI study of 705 twins and their siblings aged 12 to 29. *NeuroImage*, 54(3), 2308–17.
  59. Cleveland WS, Devlin SJ (1988) *Locally Weighted Regression: An Approach to Regression Analysis by Local Fitting*. *Journal of the American Statistical Association*, Vol. 83, 596–610.
